# Supplementary material for: Hierarchically structured lithium titanate for ultrafast charging in long-life high capacity batteries
Source: PubMed Central journal article supplement (PMC5458554; doi:10.1038/ncomms15636), 2017-05-26
Supplement: ncomms15636-s1.pdf [file ncomms15636-s1.pdf]

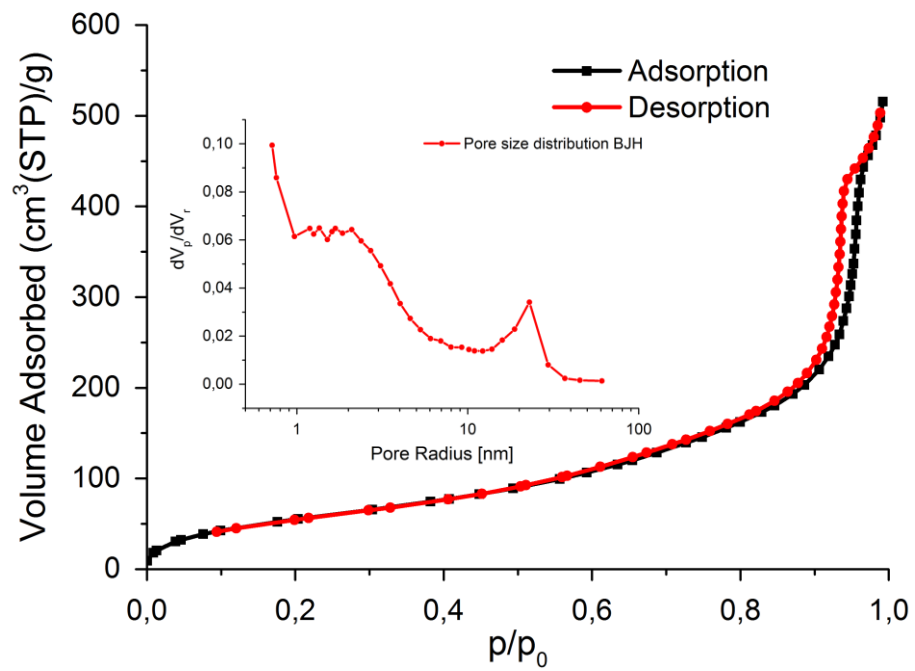

**Supplementary Figure 1** Nitrogen adsorption/desorption isotherms and Barrett-Joyner-Halenda (BJH) pore size distribution (insert) analysis for the as-obtained LTO.

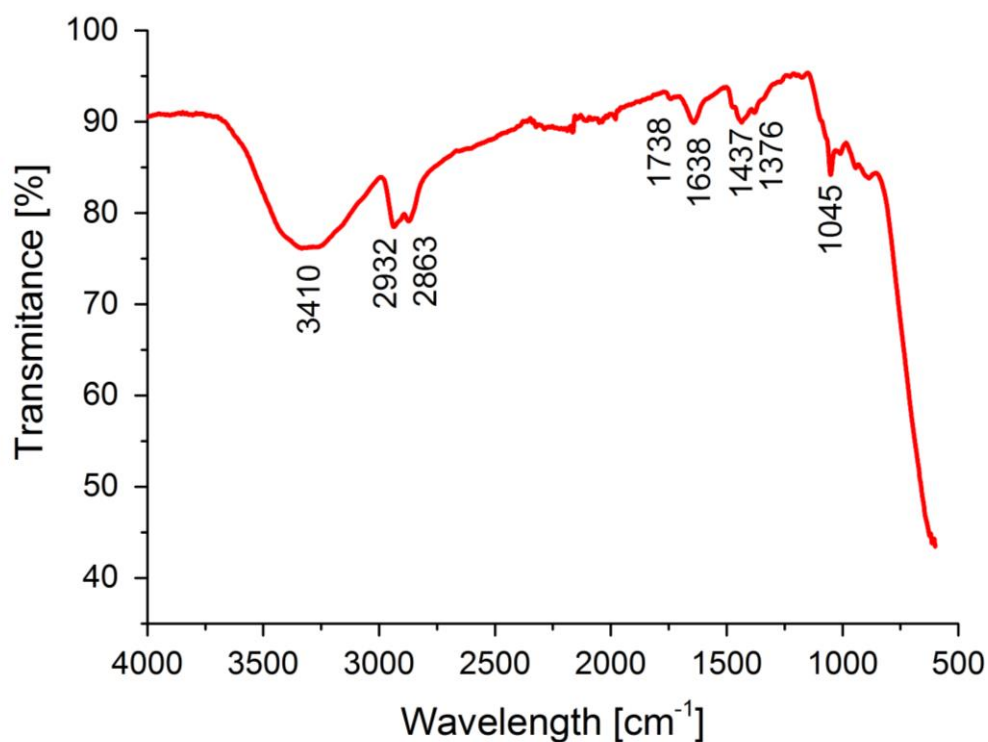

**Supplementary Figure 2** Fourier transform infrared (FT-IR) spectroscopy of obtained LTO. The surface of NPs was examined by means of FTIR. Broad and strong peak with the maximum at 3410 cm<sup>-1</sup> and peak at 1638 cm<sup>-1</sup> correspond to O-H groups at the surface of NPs and adsorbed water. The 2932 cm<sup>-1</sup> and 2863 cm<sup>-1</sup> peaks are due to the asymmetric and symmetric stretching of the methylene groups from butoxy groups and 1,4-BD. Then it was confirmed by the peaks located at 1437, 1376 cm<sup>-1</sup> (wagging modes of methylene groups) and 1045 cm<sup>-1</sup> which is due to stretching of C-O bonds. Peak at 1738 cm<sup>-1</sup> is probably due to some carboxylic group from lithium acetate and it corresponds to C=O stretching. As the conclusion, nanoparticles are mostly covered with 1,4-butanediol and butoxy groups, which are not completely removed during washing step. This shows that 1,4-BD serve as capping agents preventing further growth of particles.

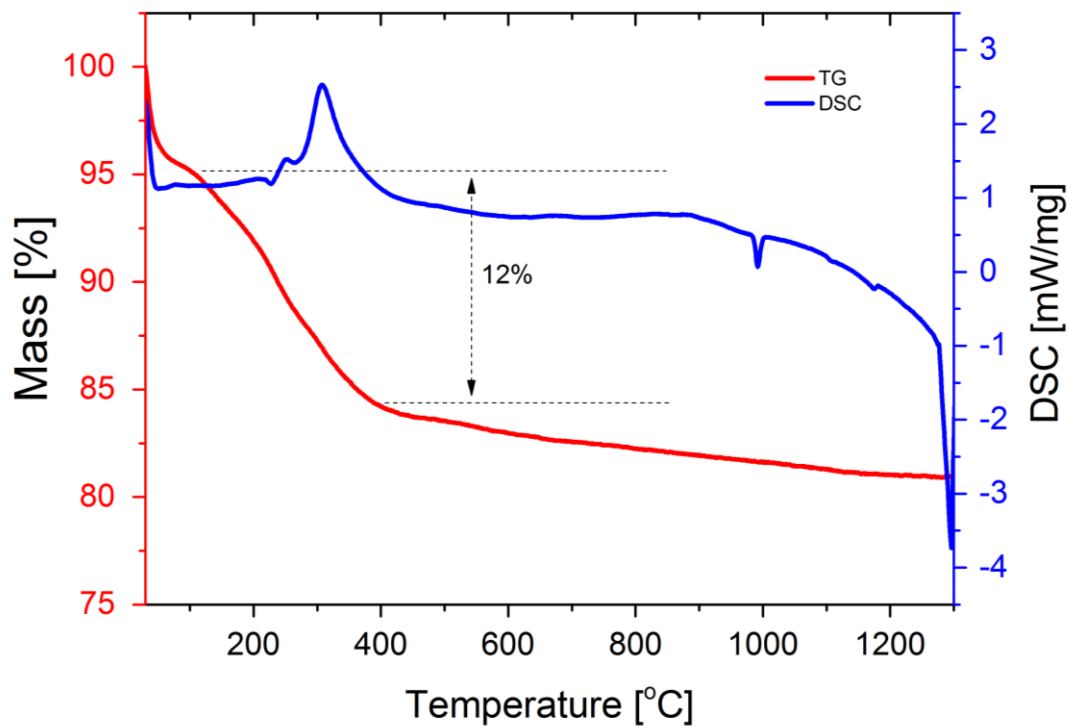

**Supplementary Figure 3** Thermal gravimetric analysis and differential scanning calorimetry of as-obtained LTO. The amount of adsorbed organics was evaluated by thermal analysis. Up to around 1200°C, adsorbed water is removed from the nanoparticles. Then gradually –OH groups and organic species are removed from the surface (exothermic peaks at 251 and 307°C).

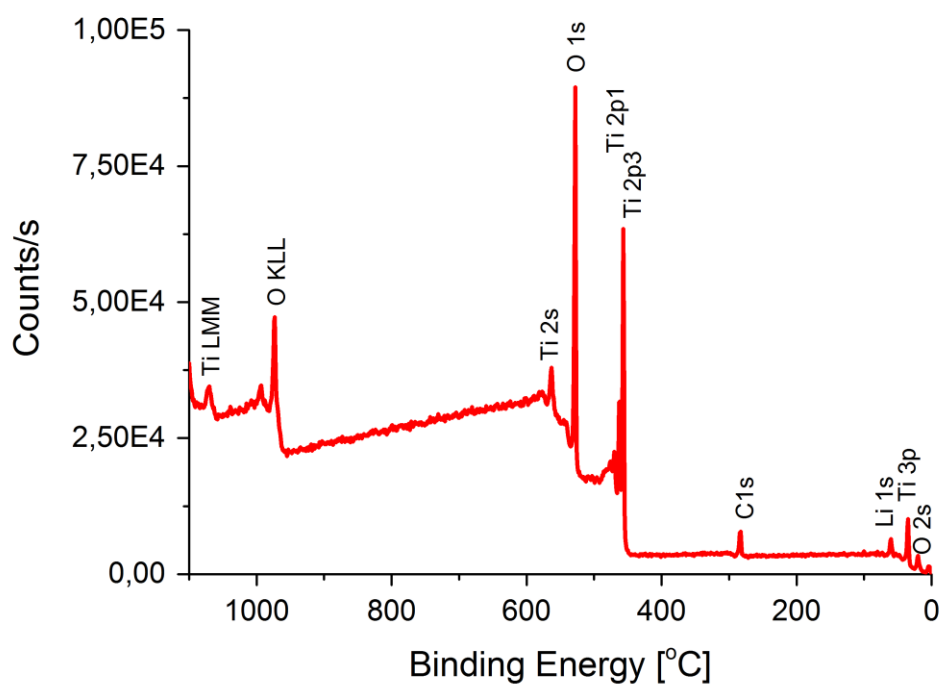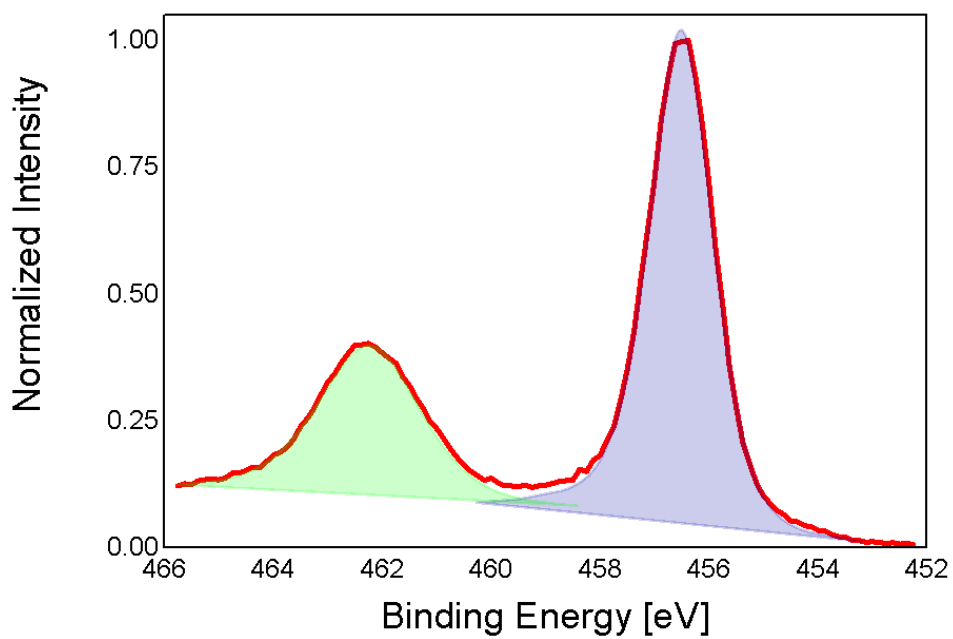

**Supplementary Figure 4.** XPS spectra (**upper**) and Ti2p XPS spectra (**bottom**) of hierarchically nanostructured LTO.

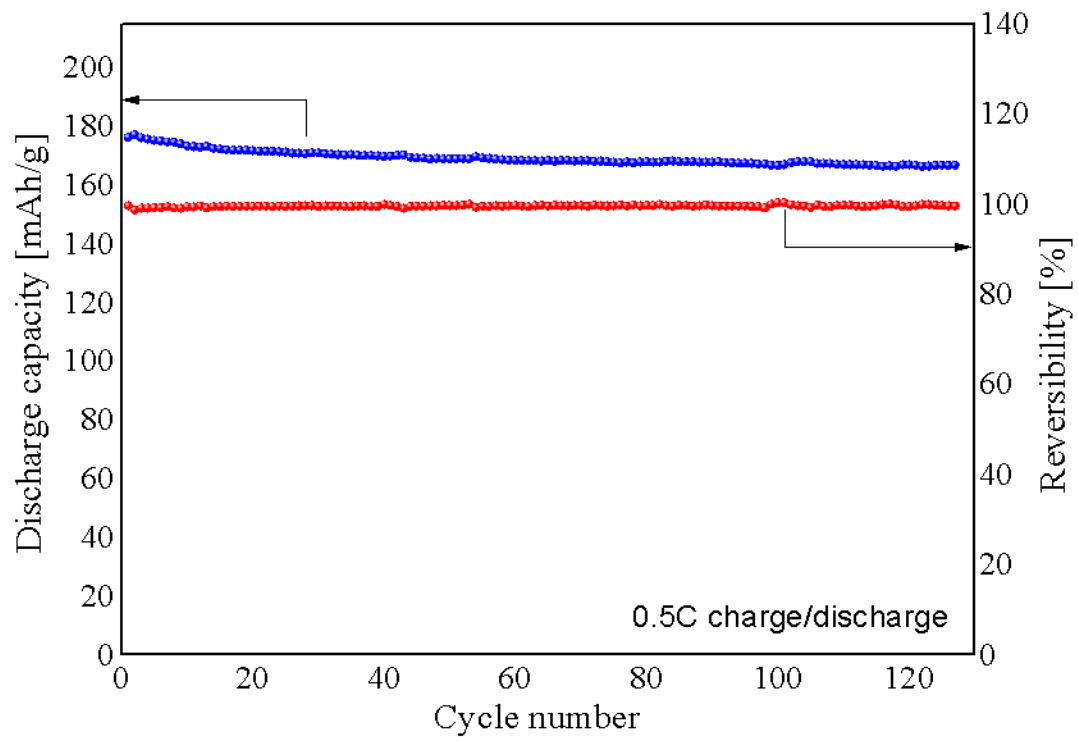

**Supplementary Figure 5.** Initial 120 cycles of Li/Li<sup>+</sup>/LTO battery at 0,5 C current rate.

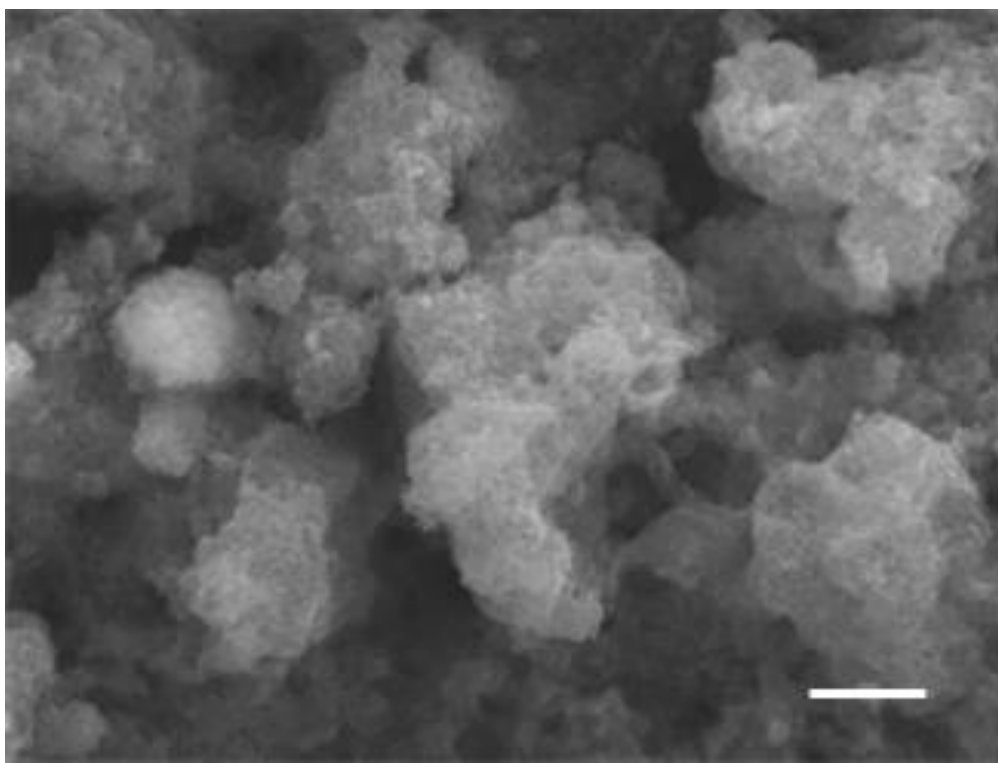

**Supplementary Figure 6.** SEM picture of anode layer prepared from LTO and cycled 300 times at 50C. Scale bar, 1 $\mu$ m.

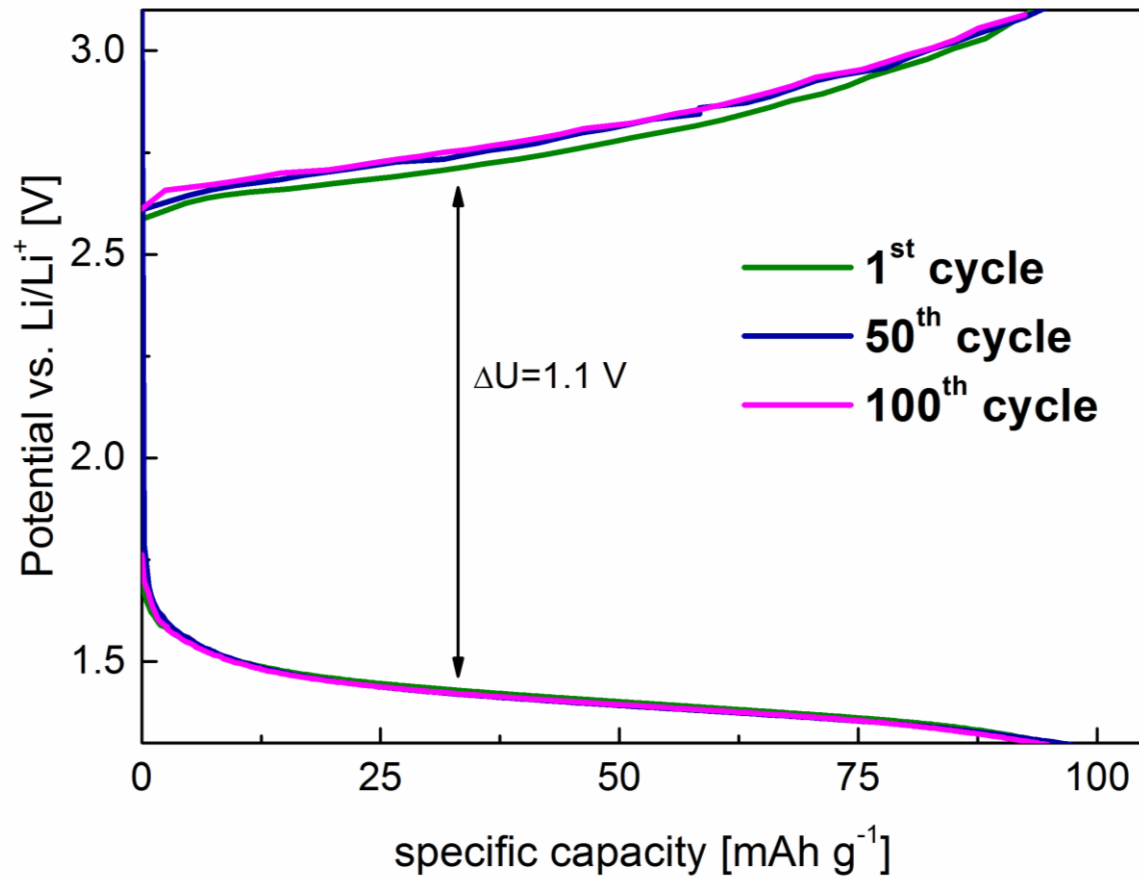

**Supplementary Figure 7.** Selected charge/discharge profiles for Li/Li<sup>+</sup>/LTO battery charged at 500 C and discharged at 50 C current rate.

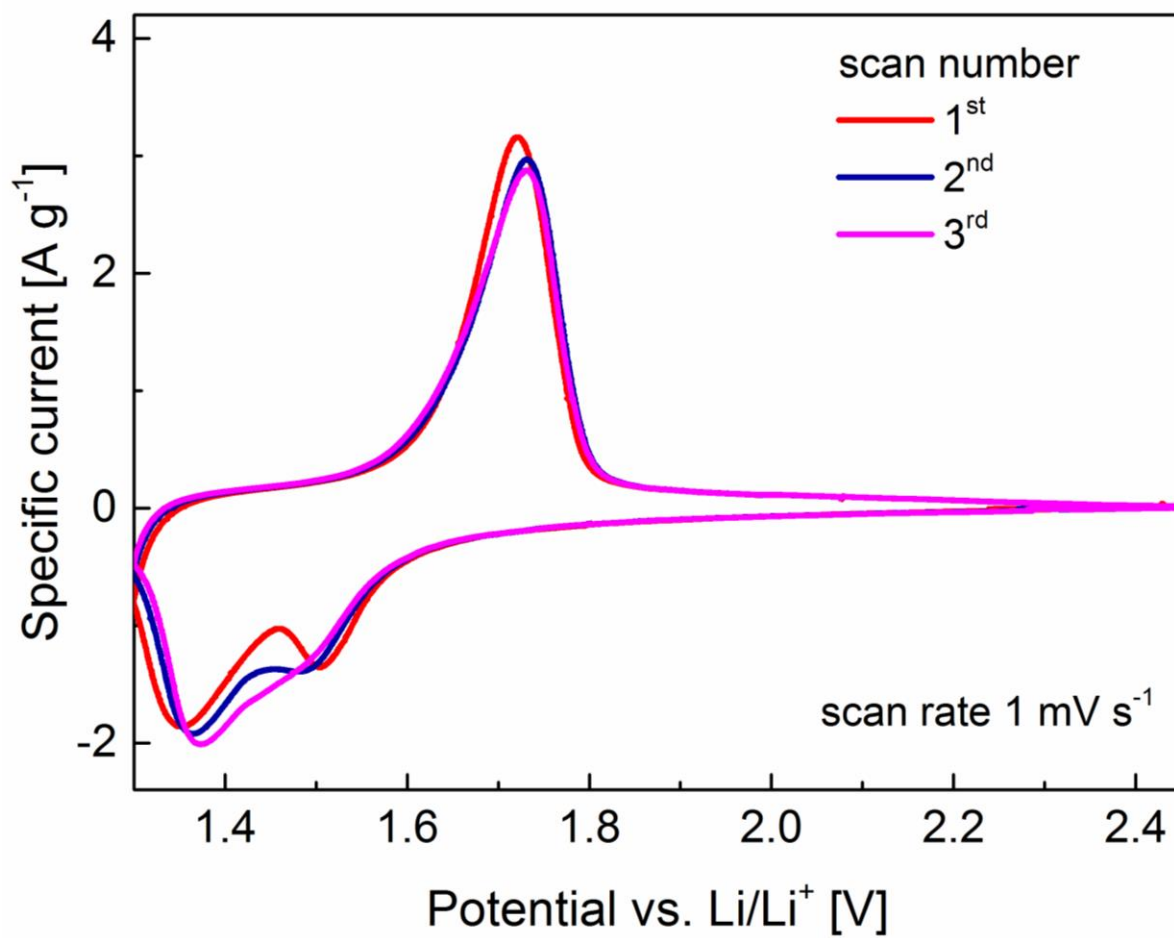

**Supplementary Figure 8.** Results of cycling voltammetry studies of Li/Li<sup>+</sup>/LTO battery performed with 1 mV s<sup>-1</sup> scanning rate.



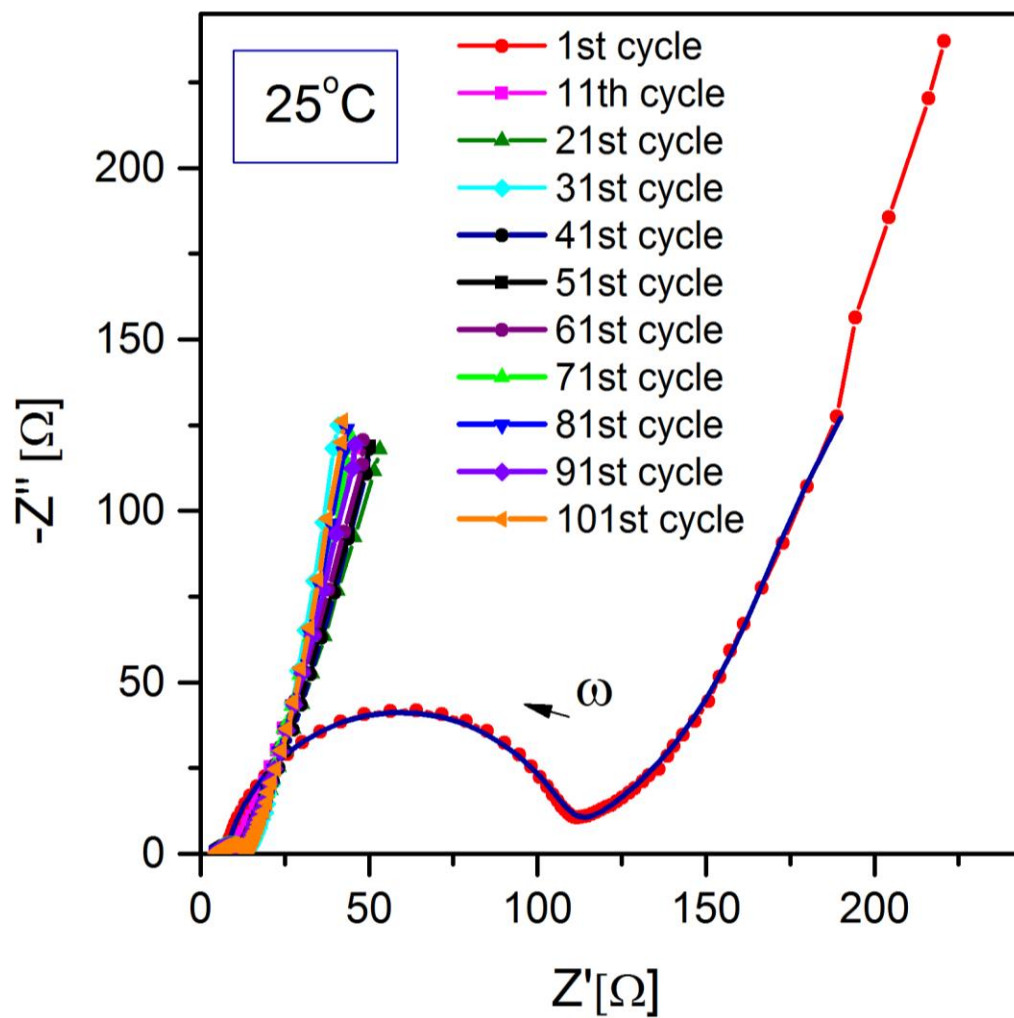

Supplementary Figure 9. EIS data on cycling, recorded for Li/Li<sup>+</sup>/LTO cell.

**Supplementary Table 1** Atomic composition of as-obtained LTO calculated from XPS results.

|                           | <b>C</b> | <b>O</b> | <b>Ti</b> | <b>Li</b> | <b>Li/Ti</b> | <b>O/(Li+Ti)</b> |
|---------------------------|----------|----------|-----------|-----------|--------------|------------------|
| <b>LTO 1<sup>st</sup></b> | 11.7     | 58.0     | 20.4      | 9.9       | 0.49         | 1.91             |
| <b>LTO 2<sup>nd</sup></b> | 10.7     | 58.2     | 20.8      | 10.3      | 0.50         | 1.87             |
